# Supplementary material
Source: PubMed Central journal article supplement (PMC4076561)

**A**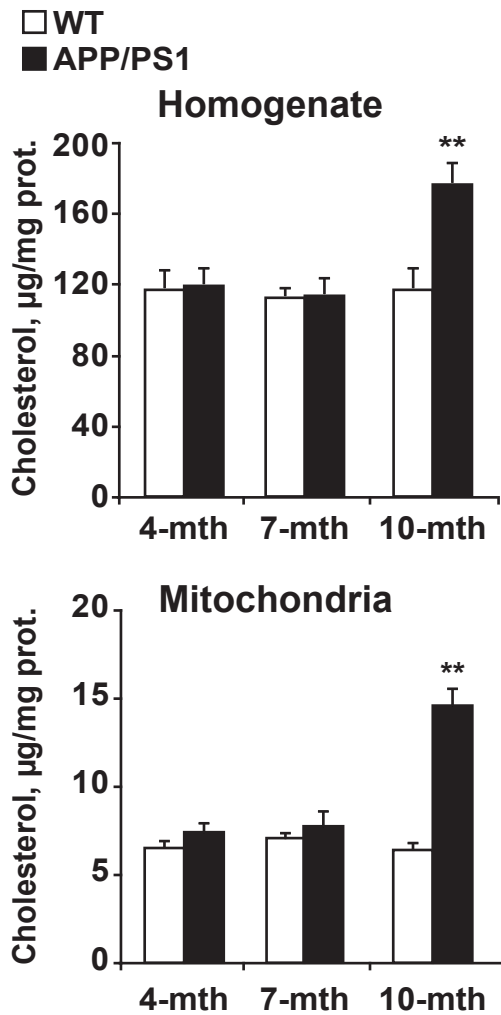**B**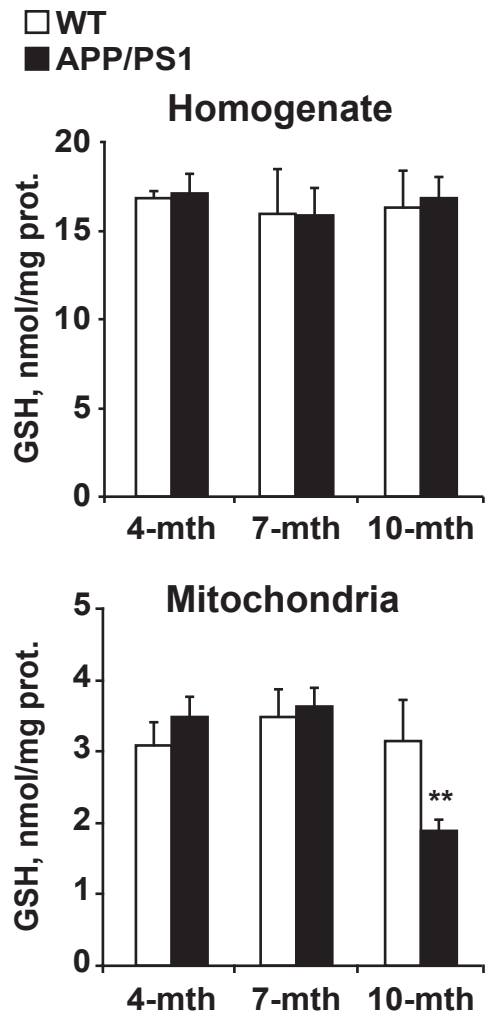

Supplement: mmc1.pdf [file mmc1.pdf]

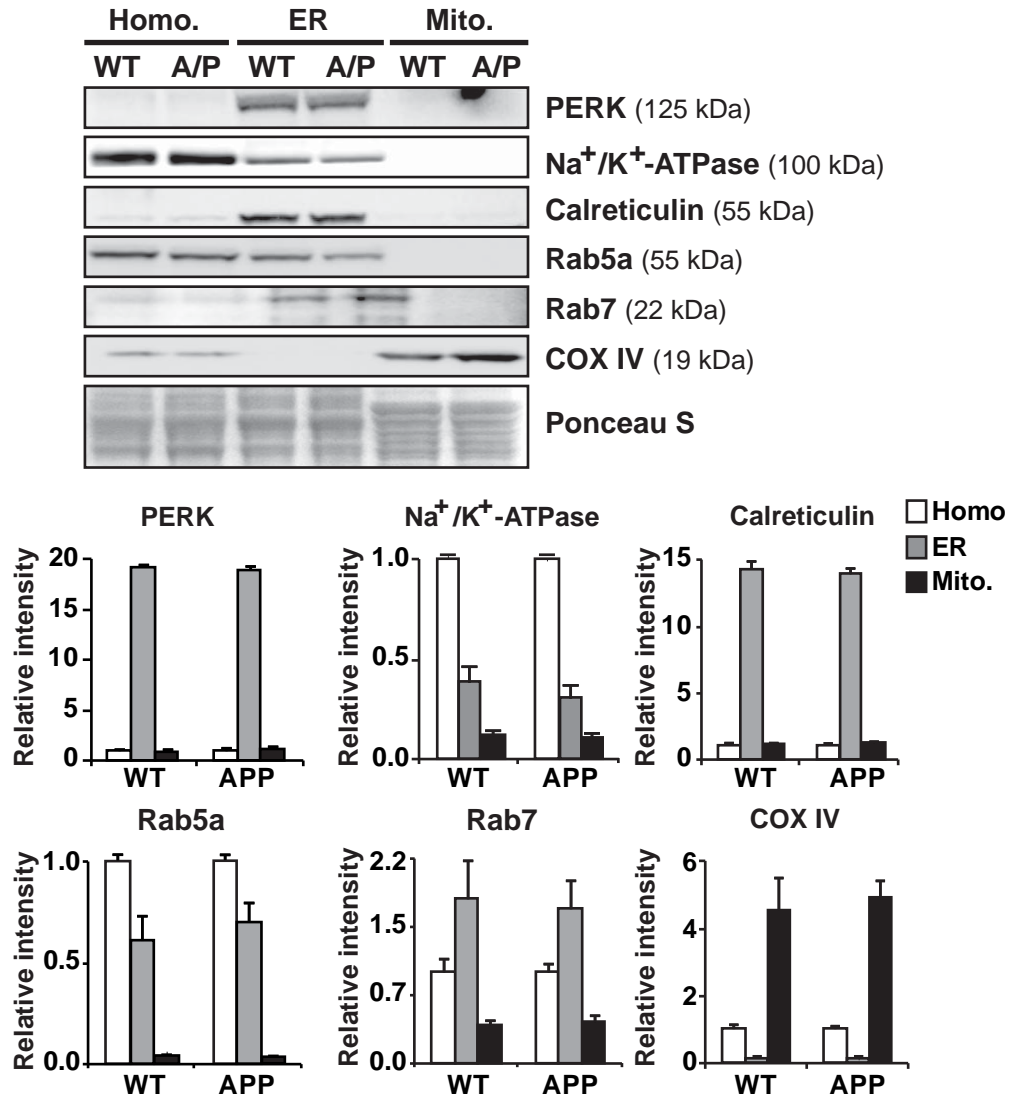

Barbero et. al., Supplemental Figure 2

Supplement: mmc2.pdf [file mmc2.pdf]

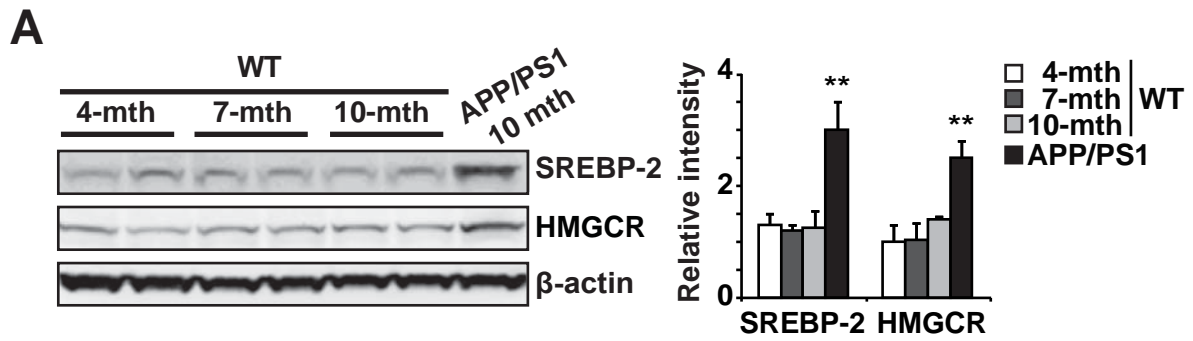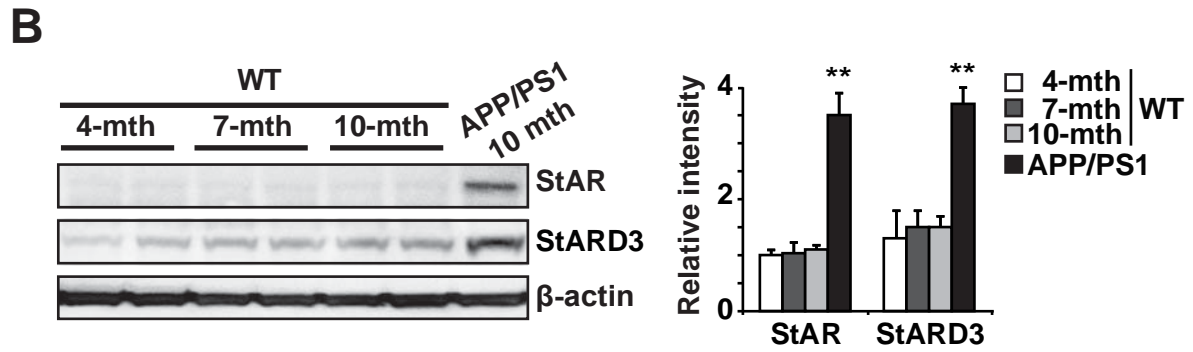

Supplement: mmc3.pdf [file mmc3.pdf]

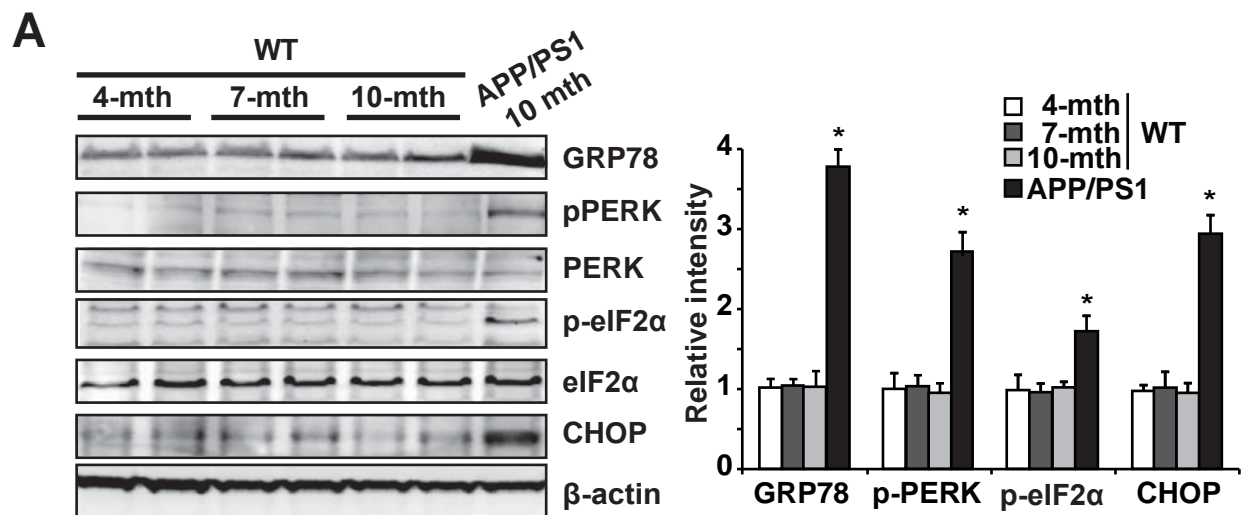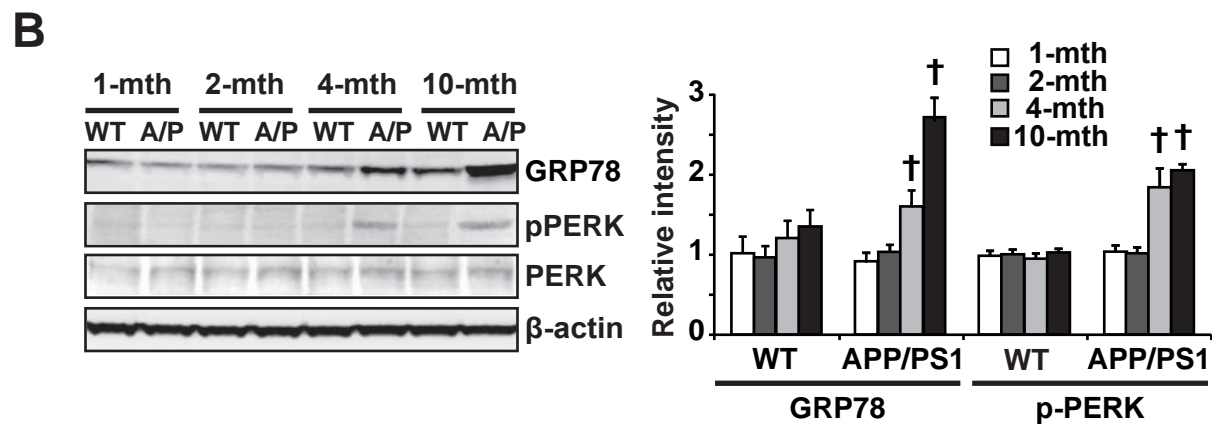

Barbero et. al., Supplemental Figure 4

Supplement: mmc4.pdf [file mmc4.pdf]

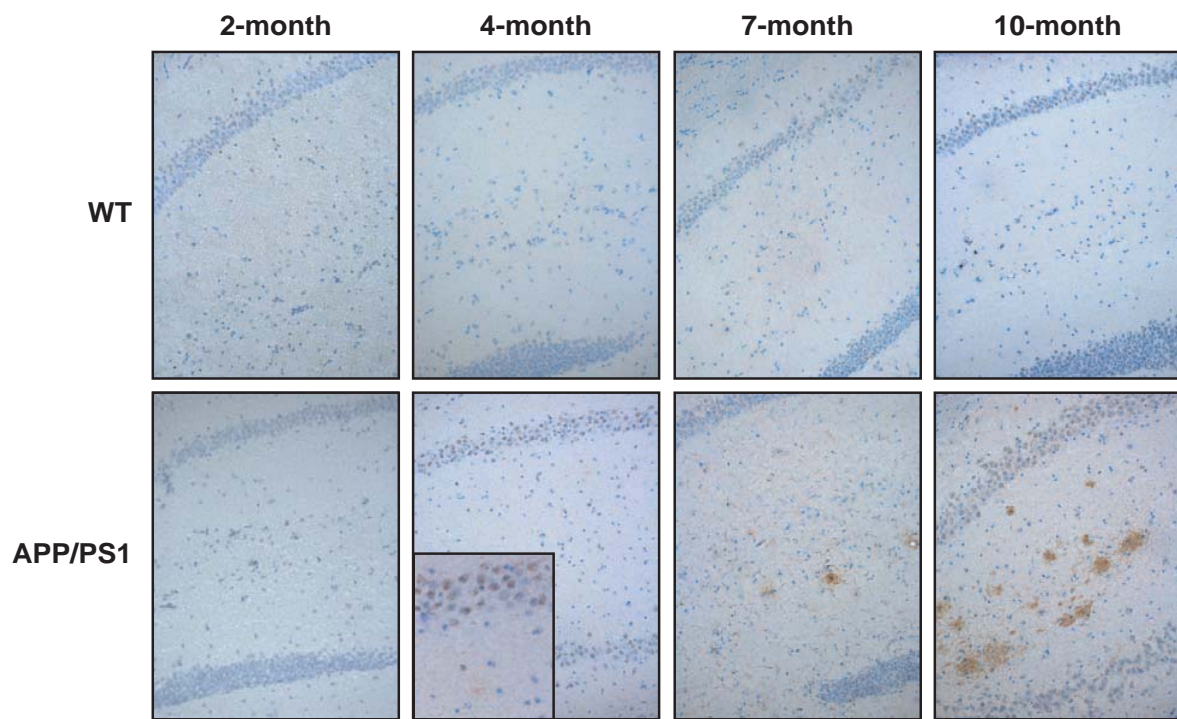

Supplement: mmc5.pdf [file mmc5.pdf]
